# Supplementary material for: Modulating the electrocatalytic activity of mononuclear nickel complexes toward water oxidation by tertiary amine group
Source: Royal Society of Chemistry journal article supplement (doi:10.1039/d2dt03381j), 2022-01-01
Supplement: d2dt03381j1.pdf [file d2dt03381j1.pdf]

Supporting information

**Modulating the electrocatalytic activity of mononuclear nickel complexes toward water oxidation by tertiary amine group**

Xiaoli Chen<sup>a</sup>, Xuehong Liao<sup>a</sup>, Chang Dai<sup>a</sup>, Lihong Zhu<sup>a</sup>, Li Hong<sup>a</sup>, Xueli Yang<sup>a</sup>, Zhijun Ruan<sup>\*a</sup>, Xiangming Liang<sup>\*b</sup>, Junqi Lin<sup>\*a</sup>

<sup>a</sup> Hubei Key Laboratory of Processing and Application of Catalytic Materials, College of Chemistry and Chemical Engineering, Huanggang Normal University, Huanggang, 438000 China.

Email: ruanzhijun87@126.com, linjunqi@hgnu.edu.cn

<sup>b</sup> School of Basic Medical Sciences, Ningxia Medical University, Yinchuan, 750004, China.

Email: liangxm6@163.com

**Electrochemical tests:** The GC electrode was subsequently polished with 300 nm and 50 nm aluminum oxide slurry for at least 3 min, followed by sonication in ethanol and distilled water separately for about 15 s, and then rinsed with ultrapure water. An indium tin oxide (ITO) electrode (1 cm<sup>2</sup> immersed in electrolyte) was used as the working electrode for the controlled potential electrolysis experiment. Before usage, the ITO electrode was cleaned by sonication in acetone, ethanol, and ultrapure water for half an hour, separately. Differential pulse voltammetry (DPV) tests were obtained with the following parameters: amplitude = 50 mV, step height = 4 mV, pulse width = 0.05 s, pulse period = 0.5 s and sampling width = 0.0167 s.

**Table S1** Crystallographic data and processing parameters for complexes 1–2

| Complex parameters | Complex 1                                                                        | Complex 2                                                                       |
|--------------------|----------------------------------------------------------------------------------|---------------------------------------------------------------------------------|
| Empirical formula  | C <sub>16</sub> H <sub>27</sub> Cl <sub>2</sub> N <sub>5</sub> NiO <sub>10</sub> | C <sub>19</sub> H <sub>28</sub> N <sub>6</sub> Cl <sub>2</sub> NiO <sub>8</sub> |
| Formula weight     | 579.02                                                                           | 598.08                                                                          |

|                                                     |                                                                 |                                                                 |
|-----------------------------------------------------|-----------------------------------------------------------------|-----------------------------------------------------------------|
| Temperature / K                                     | 292(2)                                                          | 296(2)                                                          |
| Wavelength / Å                                      | 0.71073                                                         | 0.71073                                                         |
| Crystal system                                      | Monoclinic                                                      | Triclinic                                                       |
| Space group                                         | P2 <sub>1</sub> /n                                              | P-1                                                             |
| <i>a</i> / Å                                        | 8.5418(9)                                                       | 9.414(3)                                                        |
| <i>b</i> / Å                                        | 10.8038(10)                                                     | 11.334(3)                                                       |
| <i>c</i> / Å                                        | 26.763(3)                                                       | 13.582(3)                                                       |
| $\alpha$ / deg                                      | 90                                                              | 86.743(9)                                                       |
| $\beta$ / deg                                       | 92.943                                                          | 73.749(10)                                                      |
| $\gamma$ / deg                                      | 90                                                              | 66.423(9)                                                       |
| Volume / Å <sup>3</sup>                             | 2466.5(4)                                                       | 1272.7(6)                                                       |
| Z                                                   | 4                                                               | 2                                                               |
| Calculated density / Mg m <sup>3</sup>              | 1.554                                                           | 1.561                                                           |
| Absorption coefficient / mm <sup>-1</sup>           | 1.062                                                           | 1.028                                                           |
| <i>F</i> (000)                                      | 1192                                                            | 620                                                             |
| Crystal size / mm <sup>3</sup>                      | 0.300 × 0.280 × 0.250                                           | 0.320 × 0.180 × 0.150                                           |
| $\theta$ range / deg                                | 2.033 to 25.099                                                 | 1.964 to 25.077                                                 |
|                                                     | -10 ≤ <i>h</i> ≤ 10                                             | -11 ≤ <i>h</i> ≤ 11                                             |
| Index ranges                                        | -12 ≤ <i>h</i> ≤ 12                                             | -13 ≤ <i>k</i> ≤ 13                                             |
|                                                     | -31 ≤ <i>l</i> ≤ 31                                             | -16 ≤ <i>l</i> ≤ 16                                             |
| Reflections collected                               | 94397                                                           | 37608                                                           |
| Independent reflections                             | 4383 [ <i>R</i> (int) = 0.0607]                                 | 4505 [ <i>R</i> (int) = 0.0889]                                 |
| Completeness to theta                               | 99.9 % (25.099°)                                                | 99.6 % (25.077°)                                                |
| Refinement method                                   | Full-matrix least-squares on <i>F</i> <sup>2</sup>              |                                                                 |
| Data / restraints / parameters                      | 4383 / 0 / 312                                                  | 4505 / 0 / 327                                                  |
| Goodness-of-fit on <i>F</i> <sup>2</sup>            | 1.031                                                           | 1.027                                                           |
| Final <i>R</i> indices [ <i>I</i> > 2σ( <i>I</i> )] | <i>R</i> <sub>1</sub> = 0.0517, <i>wR</i> <sub>2</sub> = 0.1569 | <i>R</i> <sub>1</sub> = 0.0602, <i>wR</i> <sub>2</sub> = 0.1664 |
| <i>R</i> indices (all data)                         | <i>R</i> <sub>1</sub> = 0.0562, <i>wR</i> <sub>2</sub> = 0.1623 | <i>R</i> <sub>1</sub> = 0.0791, <i>wR</i> <sub>2</sub> = 0.1850 |
| Largest diff. peak and hole                         | 0.681 and -0.517 e.Å <sup>-3</sup>                              | 0.598 and -0.563 e.Å <sup>-3</sup>                              |

$$R_1 = \frac{\sum ||F_o| - |F_c||}{\sum |F_o|}, wR_2 = \left[ \frac{\sum (|F_o|^2 - |F_c|^2)^2}{\sum (F_o^2)} \right]^{1/2}$$

**Table S2** Crystallographic data and processing parameters for complexes **3** and **5**

| Complex parameters | Complex <b>3</b>                                                                | Complex <b>5</b>                                                                |
|--------------------|---------------------------------------------------------------------------------|---------------------------------------------------------------------------------|
| Empirical formula  | C <sub>19</sub> H <sub>31</sub> N <sub>5</sub> Cl <sub>2</sub> NiO <sub>9</sub> | C <sub>17</sub> H <sub>27</sub> N <sub>5</sub> Cl <sub>2</sub> ZnO <sub>9</sub> |

|                                                     |                                                                 |                                                                 |
|-----------------------------------------------------|-----------------------------------------------------------------|-----------------------------------------------------------------|
| Formula weight                                      | 603.10                                                          | 581.70                                                          |
| Temperature / K                                     | 296(2)                                                          | 293(2)                                                          |
| Wavelength / Å                                      | 0.71073                                                         | 0.71073                                                         |
| Crystal system                                      | Monoclinic                                                      | Monoclinic                                                      |
| Space group                                         | P2 <sub>1</sub> /c                                              | P2 <sub>1</sub> /c                                              |
| <i>a</i> / Å                                        | 9.0633(12)                                                      | 8.739(7)                                                        |
| <i>b</i> / Å                                        | 32.964(5)                                                       | 17.836(14)                                                      |
| <i>c</i> / Å                                        | 8.8182(13)                                                      | 15.852(14)                                                      |
| $\alpha$ / deg                                      | 90                                                              | 90                                                              |
| $\beta$ / deg                                       | 104.961(5)                                                      | 100.78                                                          |
| $\gamma$ / deg                                      | 90                                                              | 90                                                              |
| Volume / Å <sup>3</sup>                             | 2545.3(6)                                                       | 2427(3)                                                         |
| Z                                                   | 4                                                               | 4                                                               |
| Calculated density / Mg m <sup>3</sup>              | 1.574                                                           | 1.592                                                           |
| Absorption coefficient / mm <sup>-1</sup>           | 1.030                                                           | 1.289                                                           |
| <i>F</i> (000)                                      | 1256                                                            | 1200                                                            |
| Crystal size / mm <sup>3</sup>                      | 0.320 × 0.280 × 0.250                                           | 0.270 × 0.260 × 0.250                                           |
| $\theta$ range / deg                                | 2.326 to 25.100                                                 | 2.284 to 25.151                                                 |
|                                                     | -10 ≤ <i>h</i> ≤ 10                                             | -10 ≤ <i>h</i> ≤ 10                                             |
| Index ranges                                        | -39 ≤ <i>k</i> ≤ 39                                             | -21 ≤ <i>k</i> ≤ 21                                             |
|                                                     | -10 ≤ <i>l</i> ≤ 10                                             | -18 ≤ <i>l</i> ≤ 18                                             |
| Reflections collected                               | 77120                                                           | 96721                                                           |
| Independent reflections                             | 4521 [ <i>R</i> (int) = 0.0476]                                 | 4280 [ <i>R</i> (int) = 0.0648]                                 |
| Completeness to theta                               | 99.8 % (25.100°)                                                | 98.1 % (25.151°)                                                |
| Refinement method                                   | Full-matrix least-squares on <i>F</i> <sup>2</sup>              |                                                                 |
| Data / restraints / parameters                      | 4521 / 0 / 329                                                  | 4280 / 0 / 309                                                  |
| Goodness-of-fit on <i>F</i> <sup>2</sup>            | 1.065                                                           | 1.013                                                           |
| Final <i>R</i> indices [ <i>I</i> > 2σ( <i>I</i> )] | <i>R</i> <sub>1</sub> = 0.0498, <i>wR</i> <sub>2</sub> = 0.1471 | <i>R</i> <sub>1</sub> = 0.0331, <i>wR</i> <sub>2</sub> = 0.0879 |
| <i>R</i> indices (all data)                         | <i>R</i> <sub>1</sub> = 0.0535, <i>wR</i> <sub>2</sub> = 0.1504 | <i>R</i> <sub>1</sub> = 0.0407, <i>wR</i> <sub>2</sub> = 0.0942 |
| Largest diff. peak and hole                         | 1.163 and -0.514 e.Å <sup>-3</sup>                              | 0.551 and -0.369 e.Å <sup>-3</sup>                              |

$$R_1 = \frac{\sum ||F_o| - |F_c||}{\sum |F_o|}, wR_2 = \left[ \frac{\sum (|F_o|^2 - |F_c|^2)^2}{\sum (F_o^2)} \right]^{1/2}$$

**Table S3** Selected bond lengths (Å) and angles (deg) for complexes **1** and **2**

| Complex         | <b>1</b> | Complex         | <b>2</b> |
|-----------------|----------|-----------------|----------|
| Bond length (Å) |          | Bond length (Å) |          |

|                   |            |                   |            |
|-------------------|------------|-------------------|------------|
| Ni1–N1            | 2.070(3)   | Ni1–N1            | 2.066(4)   |
| Ni1–N2            | 2.115(3)   | Ni1–N2            | 2.121(4)   |
| Ni1–N3            | 2.111(3)   | Ni1–N3            | 2.133(4)   |
| Ni1–N4            | 2.063(3)   | Ni1–N4            | 2.074(5)   |
| Ni1–N5            | 2.075(3)   | Ni1–N5            | 2.082(4)   |
| Ni1–O1            | 2.136(3)   | Ni1–N6            | 2.114(5)   |
| Bond angles (deg) |            | Bond angles (deg) |            |
| N1–Ni1–N2         | 80.19(12)  | N1–Ni1–N2         | 80.90(16)  |
| N1–Ni1–N3         | 94.92(12)  | N1–Ni1–N3         | 96.67(17)  |
| N1–Ni1–N4         | 176.89(12) | N1–Ni1–N4         | 175.3(2)   |
| N1–Ni1–N5         | 101.96(11) | N1–Ni1–N5         | 100.26(16) |
| N1–Ni1–O1         | 90.29(12)  | N1–Ni1–N6         | 92.09(16)  |
| N2–Ni1–N3         | 83.99(12)  | N2–Ni1–N3         | 83.57(18)  |
| N2–Ni1–N4         | 97.56(13)  | N2–Ni1–N4         | 94.4(2)    |
| N2–Ni1–N5         | 96.49(11)  | N2–Ni1–N5         | 95.05(16)  |
| N2–Ni1–O1         | 170.19(13) | N2–Ni1–N6         | 172.79(17) |
| N3–Ni1–N4         | 82.68(13)  | N3–Ni1–N4         | 83.45(19)  |
| N3–Ni1–N5         | 162.96(13) | N3–Ni1–N5         | 162.59(18) |
| N3–Ni1–O1         | 94.55(12)  | N3–Ni1–N6         | 95.64(18)  |
| N4–Ni1–N5         | 80.37(12)  | N4–Ni1–N5         | 79.35(19)  |
| N4–Ni1–O1         | 91.87(14)  | N4–Ni1–N6         | 92.6(3)    |
| N5–Ni1–O1         | 87.75(11)  | N5–Ni1–N6         | 87.84(16)  |

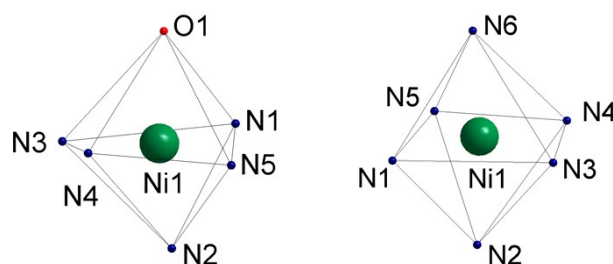

**Fig. S1** The geometry configuration of complexes **1** and **2**.

**Table S4** Selected bond lengths (Å) and angles (deg) for complexes **3** and **5**

| Complex         | <b>3</b> | Complex         | <b>5</b> |
|-----------------|----------|-----------------|----------|
| Bond length (Å) |          | Bond length (Å) |          |

|                   |            |                   |            |
|-------------------|------------|-------------------|------------|
| Ni1–N1            | 2.126(3)   | Zn1–N1            | 2.135(3)   |
| Ni1–N2            | 2.192(3)   | Zn1–N2            | 2.167(3)   |
| Ni1–N3            | 2.126(3)   | Zn1–N3            | 2.219(3)   |
| Ni1–N4            | 2.159(3)   | Zn1–N4            | 2.134(3)   |
| Ni1–N5            | 2.095(3)   | Zn1–N5            | 2.119(3)   |
| Ni1–O1            | 2.129(3)   | Zn1–O1            | 2.247(3)   |
| Bond angles (deg) |            | Bond angles (deg) |            |
| N1–Ni1–N2         | 77.16(12)  | N1–Zn1–N2         | 79.89(10)  |
| N1–Ni1–N3         | 101.53(12) | N1–Zn1–N3         | 94.50(9)   |
| N1–Ni1–N4         | 173.08(11) | N1–Zn1–N4         | 175.09(9)  |
| N1–Ni1–N5         | 97.83(11)  | N1–Zn1–N5         | 105.81(9)  |
| N1–Ni1–O1         | 84.68(11)  | N1–Zn1–O1         | 89.70(10)  |
| N2–Ni1–N3         | 83.44(14)  | N2–Zn1–N3         | 83.01(9)   |
| N2–Ni1–N4         | 108.87(12) | N2–Zn1–N4         | 100.89(11) |
| N2–Ni1–N5         | 94.20(13)  | N2–Zn1–N5         | 100.67(9)  |
| N2–Ni1–O1         | 161.10(12) | N2–Zn1–O1         | 169.14(8)  |
| N3–Ni1–N4         | 82.81(12)  | N3–Zn1–N4         | 80.82(9)   |
| N3–Ni1–N5         | 159.42(13) | N3–Zn1–N5         | 159.68(9)  |
| N3–Ni1–O1         | 95.25(13)  | N3–Zn1–O1         | 94.83(8)   |
| N4–Ni1–N5         | 78.62(11)  | N4–Zn1–N5         | 78.86(10)  |
| N4–Ni1–O1         | 89.59(11)  | N4–Zn1–O1         | 89.22(10)  |
| N5–Ni1–O1         | 93.41(12)  | N5–Zn1–O1         | 85.05(9)   |

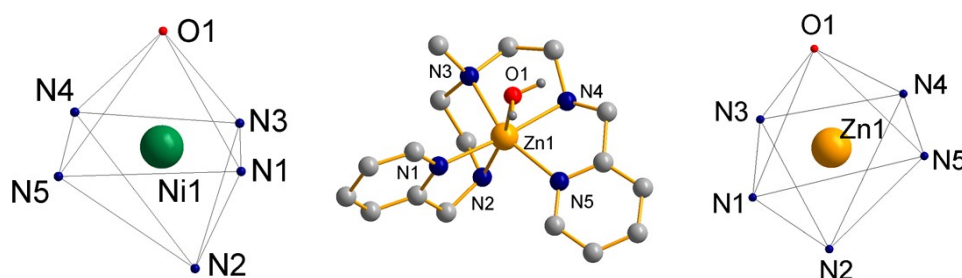

**Fig. S2** The geometry configuration of complex **3** (left); ball-and-stick representation of X-ray crystal structures (middle) and geometry configuration of complex **5** (right).

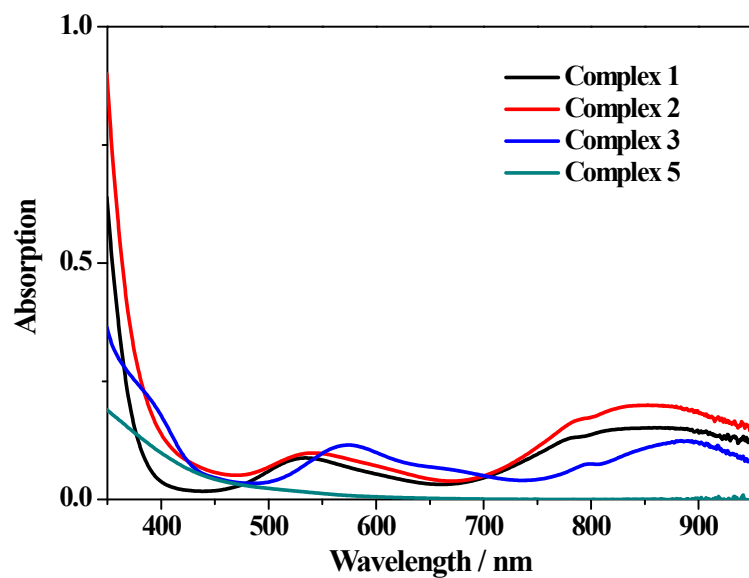

**Fig. S3** UV-vis spectra of 10 mM complexes 1–3 and 5 in 0.1 M PBS at pH 9.0.

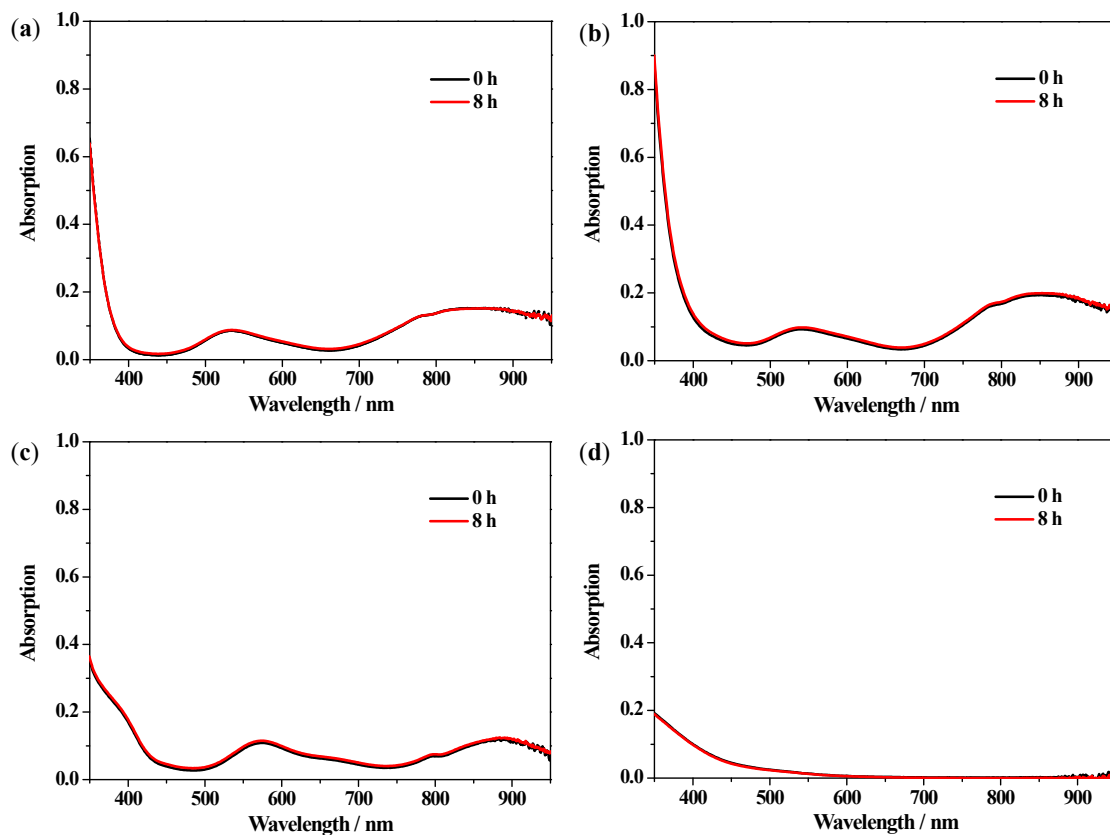

**Fig. S4** Time-dependent UV-vis absorption spectra of 10 mM complexes 1 (a), 2 (b), 3 (c) and 5 (d) in 0.1 M PBS at pH 9.0.

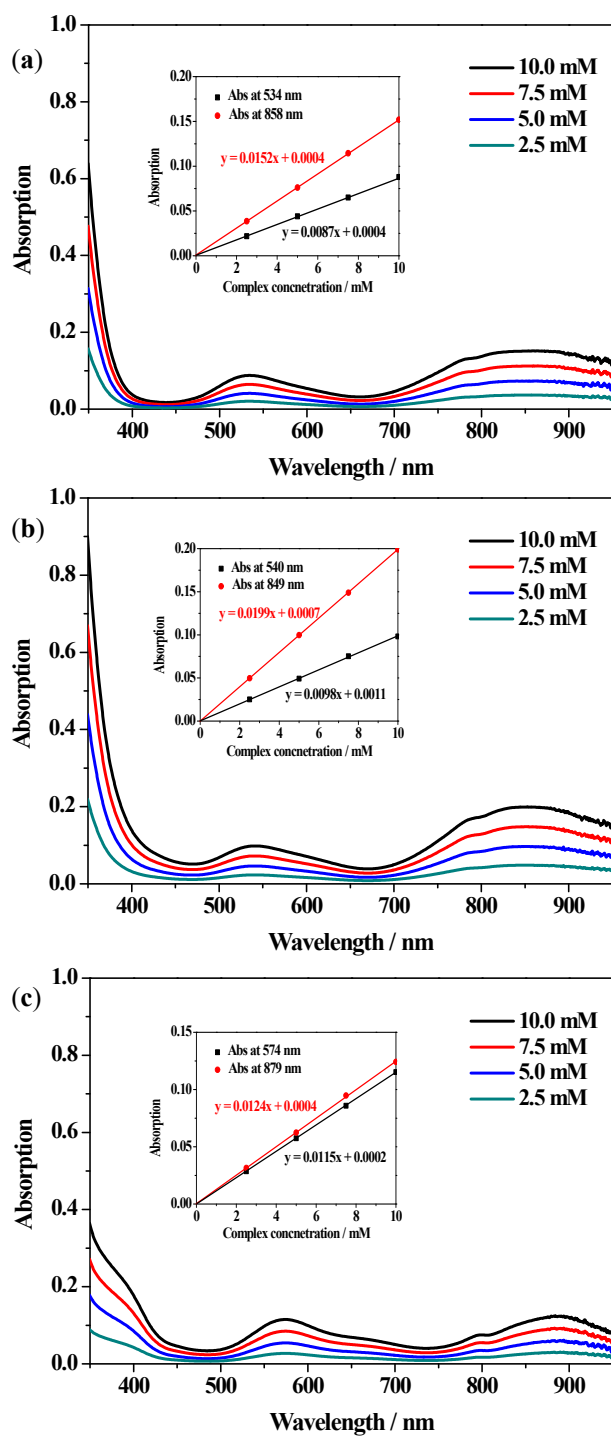

**Fig. S5** The Concentration-dependent UV-vis absorption of complexes **1** (a), **2** (b) and **3** (c).

**Table S5** The UV-vis absorption properties of complexes **1–3** and **5**

| Complex  | $\lambda_1$ / nm | $\varepsilon_1$ / M <sup>-1</sup> cm <sup>-1</sup> | $\lambda_2$ / nm | $\varepsilon_2$ / M <sup>-1</sup> cm <sup>-1</sup> |
|----------|------------------|----------------------------------------------------|------------------|----------------------------------------------------|
| <b>1</b> | 534              | 8.7                                                | 858              | 15.2                                               |
| <b>2</b> | 540              | 9.8                                                | 849              | 19.9                                               |
| <b>3</b> | 574              | 11.5                                               | 879              | 12.4                                               |



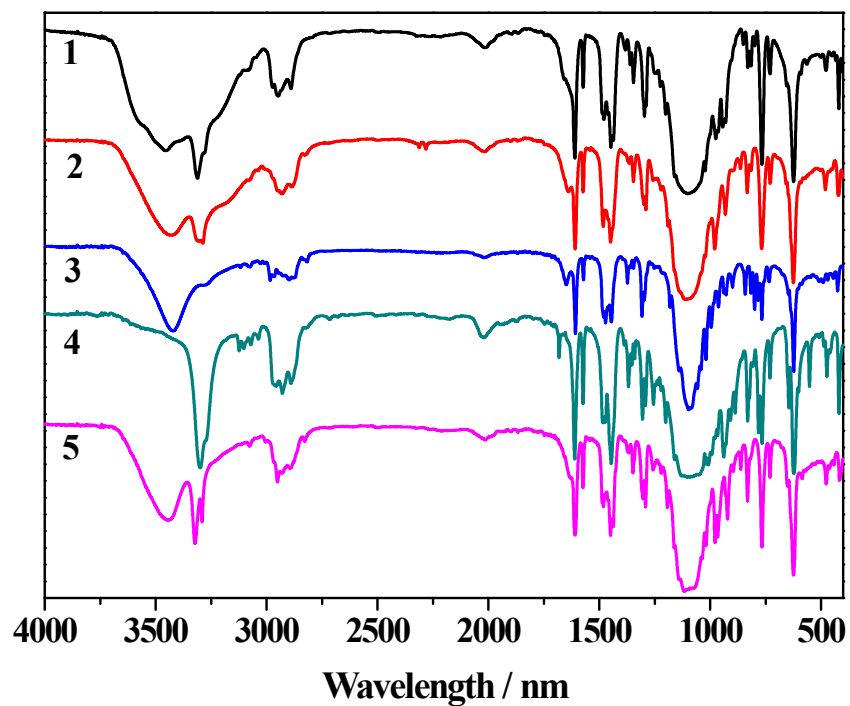

Fig. S6 Infrared spectrum of complexes 1–5.

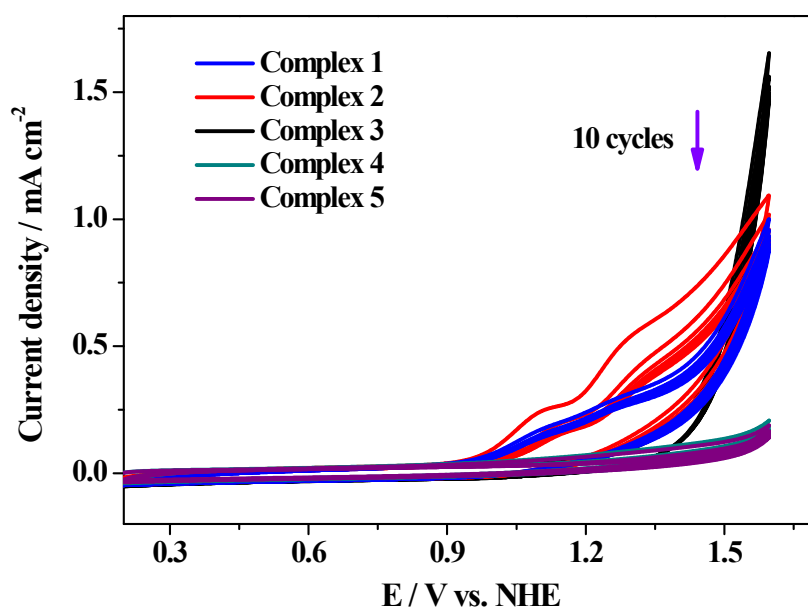

Fig. S7 Consecutive CV cyclic scan curves of 1 mM of complexes 1–5 in phosphate buffer solution (PBS) at pH 9.0, scan rate = 100 mV/s.

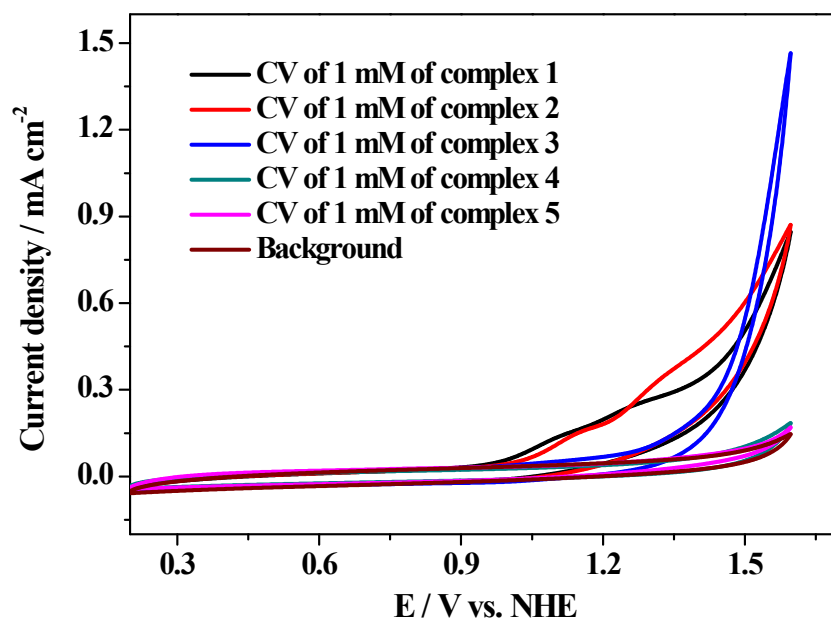

Fig. S8 CV scan curves of 1 mM of complexes 1–5 in PBS at pH 9.0, scan rate = 100 mV/s.

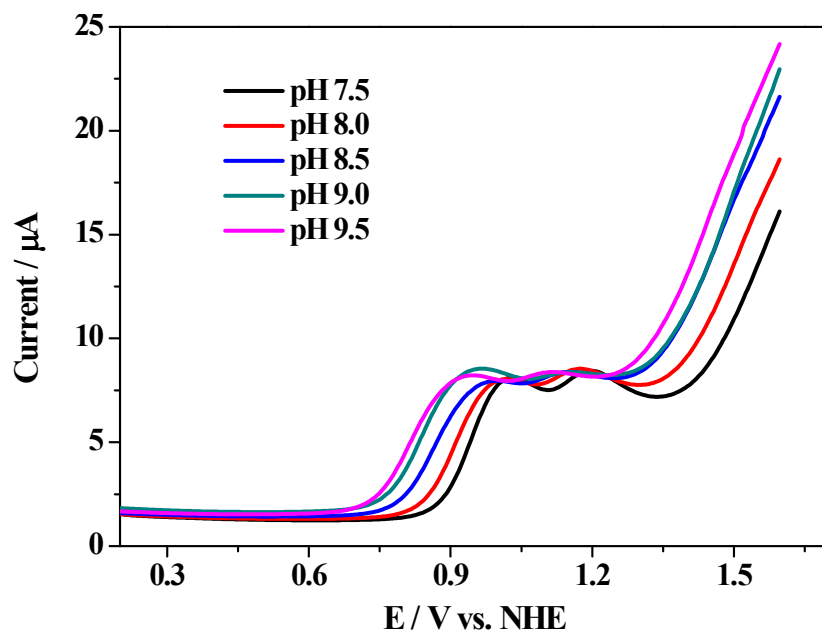

Fig. S9 DPV tests of 1.0 mM of complex 1 in 0.1 M PBS at various pH.

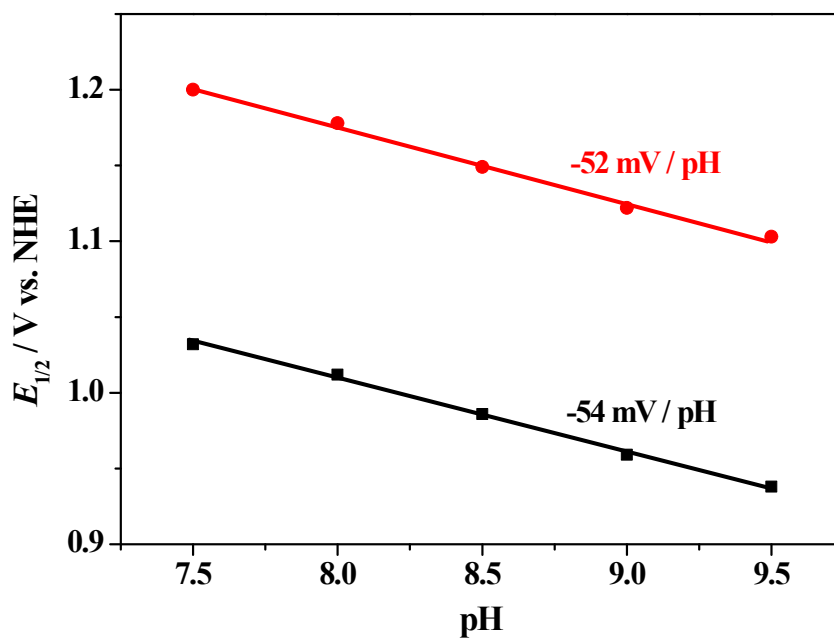

Fig. S10 Pourbaix diagram of complex 1 in 0.1 M PBS pH range of 7.5–9.5.

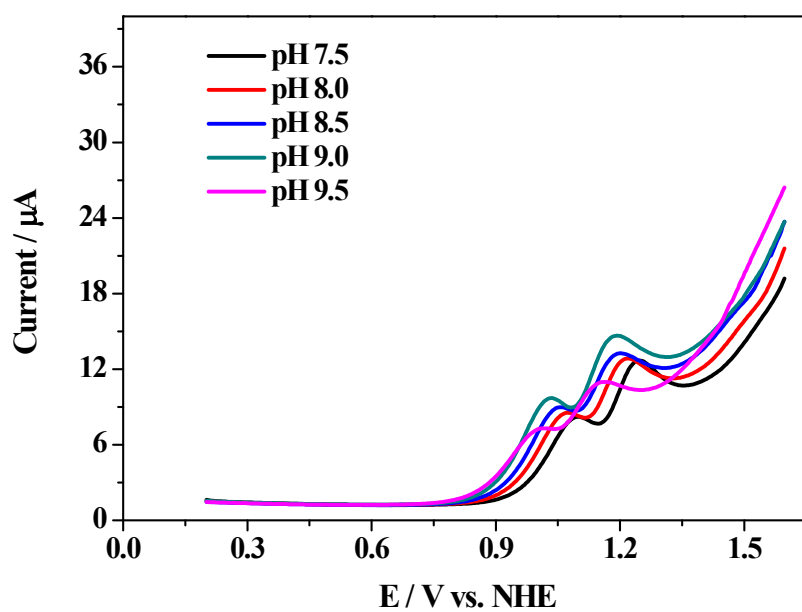

Fig. S11 DPV tests of 1.0 mM of complex 2 in 0.1 M PBS at various pH.

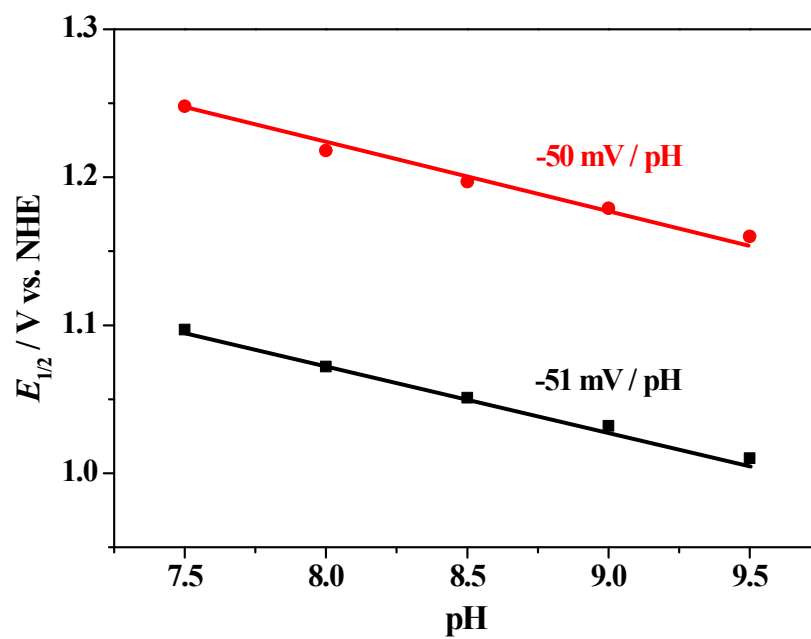

**Fig. S12** Pourbaix diagram of complex 2 in 0.1 M PBS pH range of 7.5–9.5.

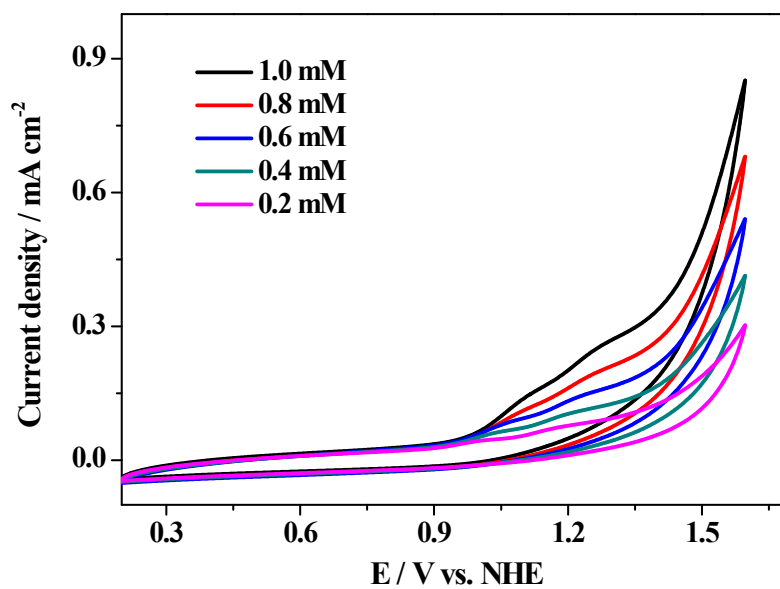

**Fig. S13** CV of complex 1 with various concentrations in 0.1 M PBS at pH 9.0, scan rate = 100 mV/s.

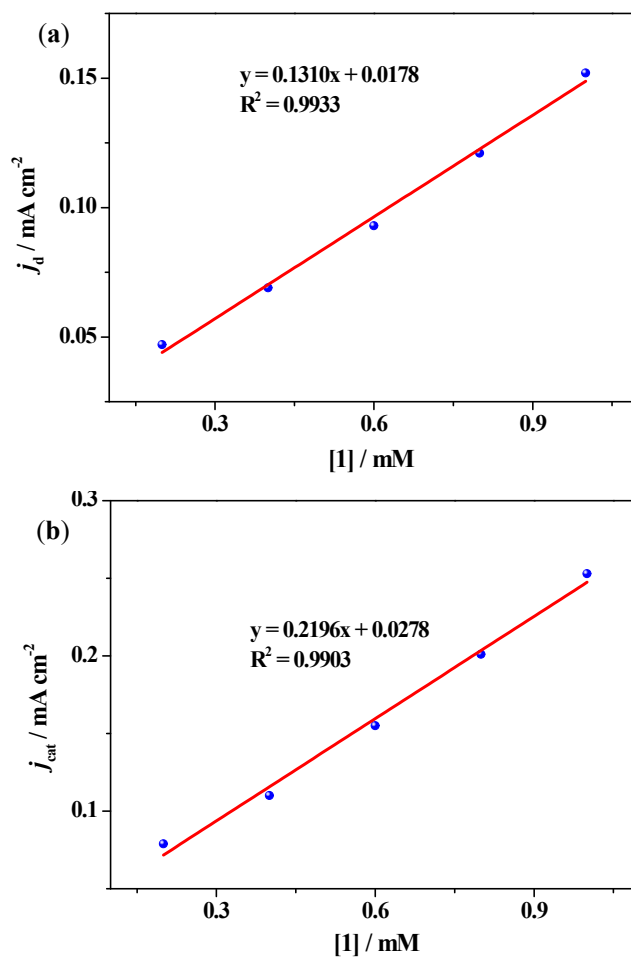

**Fig. S14** Plots of the ratio of  $j_d$  (a) and  $j_{\text{cat}}$  (b) versus the concentration of complex **1**, scan rate = 100 mV/s.

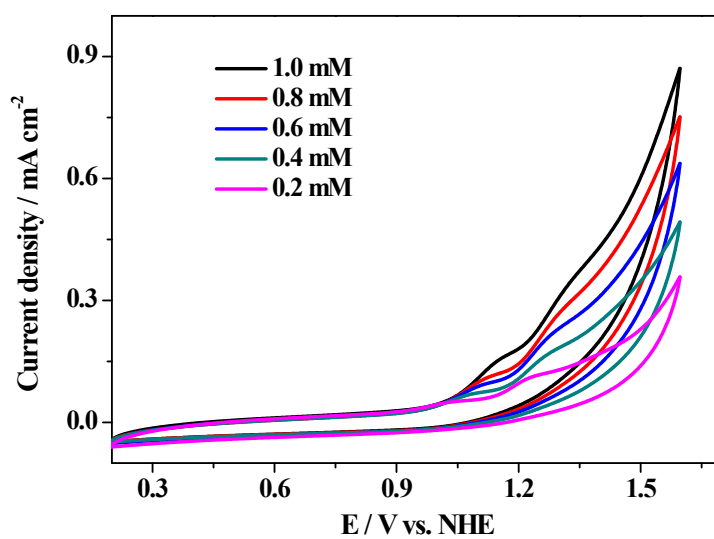

**Fig. S15** CV of complex **2** with various concentrations in 0.1 M PBS at pH 9.0, scan rate = 100 mV/s.

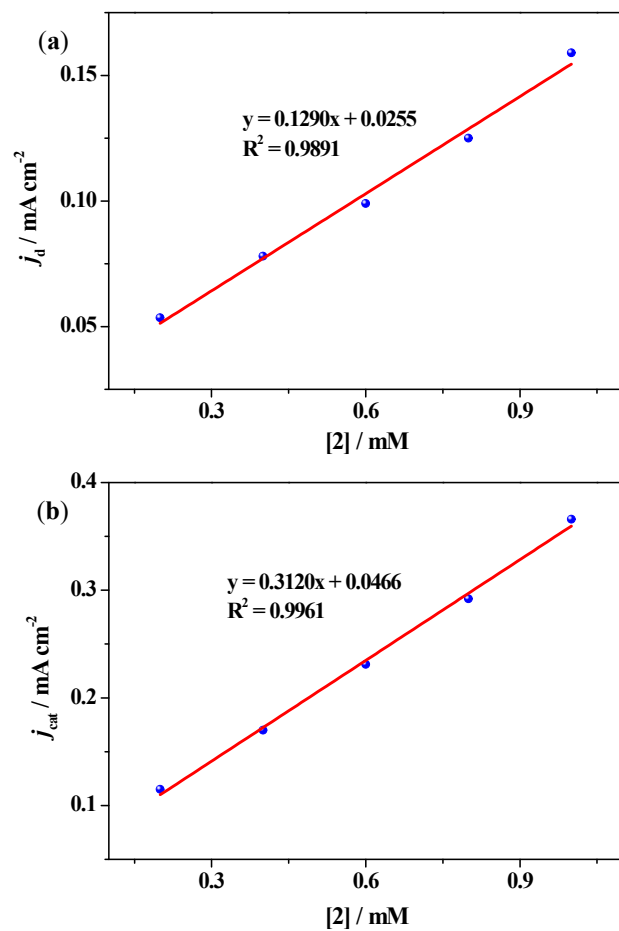

**Fig. S16** Plots of the ratio of  $j_d$  (a) and  $j_{\text{cat}}$  (b) versus the concentration of complex **2**, scan rate = 100 mV/s.

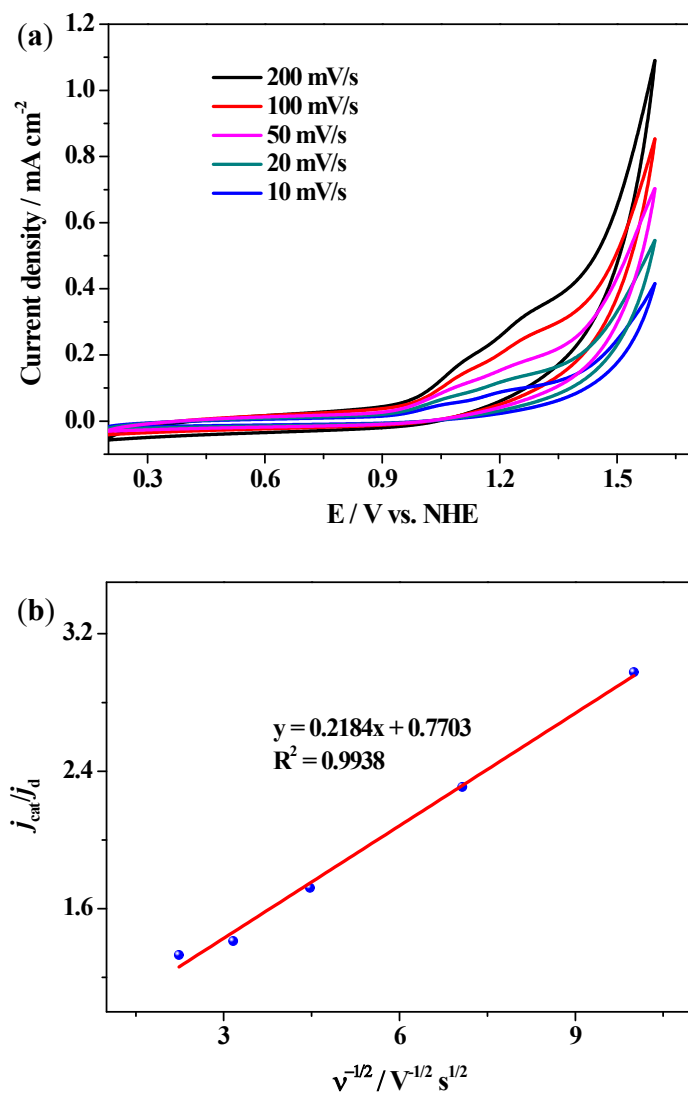

**Fig. S17** CV of 1.0 mM of **1** in 0.1 M PBS at pH 9.0 with scan rate varying from 10 to 100 mV s<sup>-1</sup> (a) and plots of the ratio of  $j_{\text{cat}}$  to  $j_{\text{d}}$  of **1** versus the reciprocal of the square root of the scan rate (b).

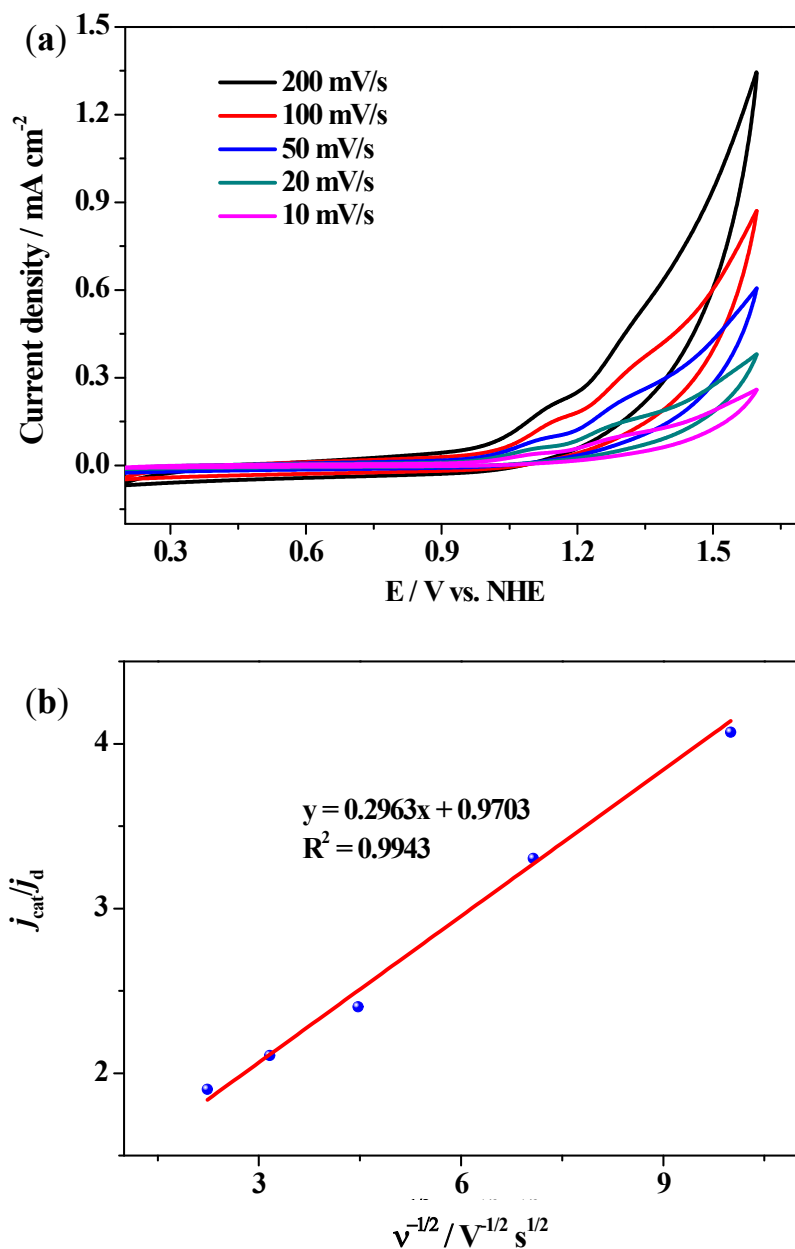

**Fig. S18** CV of 1.0 mM of **2** in 0.1 M PBS at pH 9.0 with scan rate varying from 10 to 100  $\text{mV s}^{-1}$  (a) and plots of the ratio of  $j_{\text{cat}}$  to  $j_{\text{d}}$  of **2** versus the reciprocal of the square root of the scan rate (b).



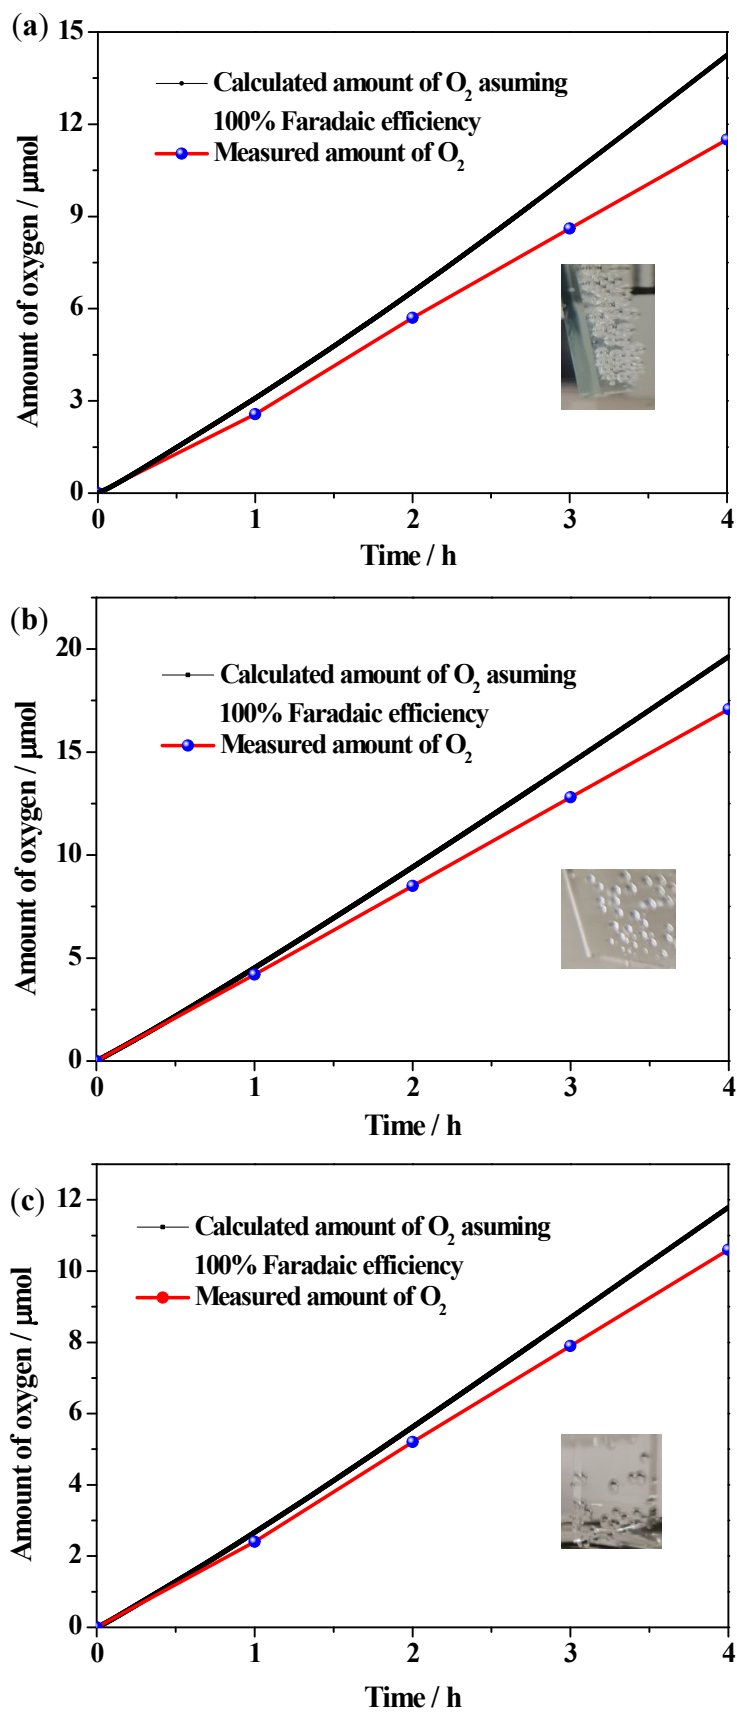

**Fig. S19** Faradaic efficiency of O<sub>2</sub> evolution for **1** (a), **2** (b), and **3** (c) under 4 h of electrolysis at 1.45 V vs. NHE in 0.1 M PBS at pH 9.0.

**Table S6** The electrocatalytic date toward water oxidation mediated by three nickel complexes

| Complex  | TOF / s <sup>-1</sup> | Potential of $j = 0.5 \text{ mA cm}^{-2}$ / V | $j$ at 1.45 V / mA cm <sup>-2</sup> |
|----------|-----------------------|-----------------------------------------------|-------------------------------------|
| <b>1</b> | 0.014                 | 1.50                                          | 0.40                                |
| <b>2</b> | 0.027                 | 1.45                                          | 0.52                                |
| <b>3</b> |                       | 1.44                                          | 0.32                                |

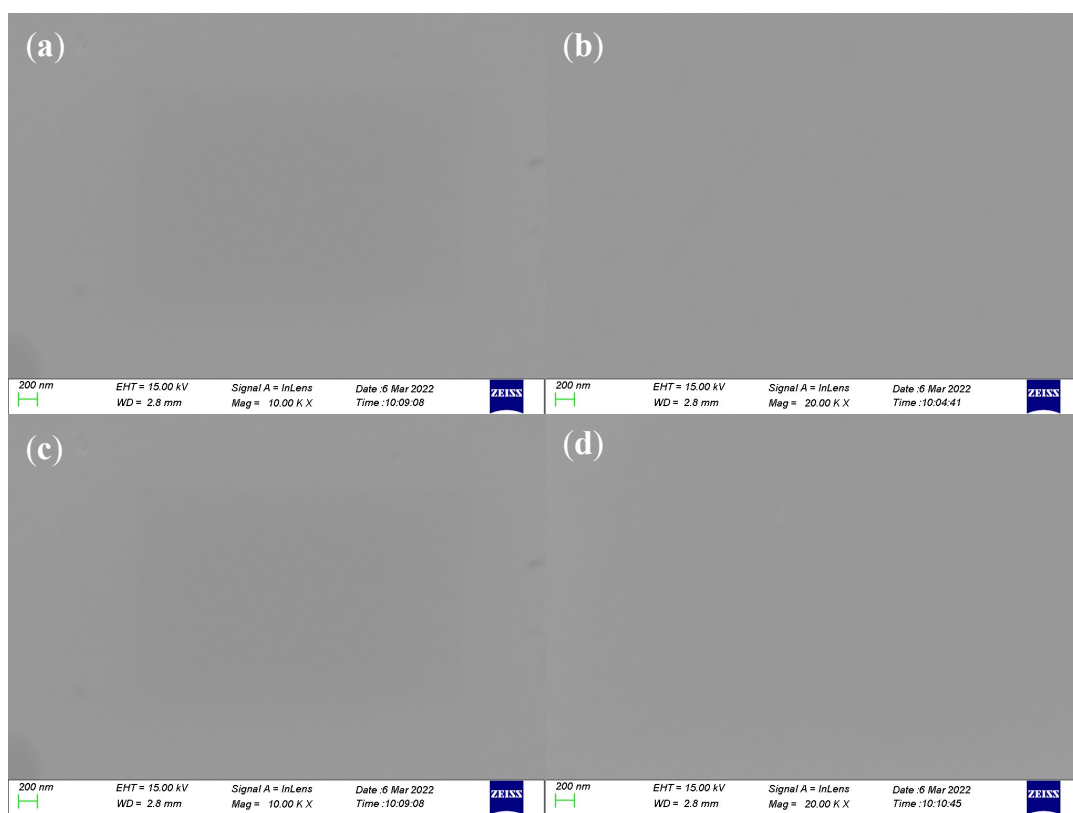

**Fig. S20** SEM images of the surface of ITO electrode before (a) and after 4 h CPE experiments of 1 mM of **1** (b), **2** (c) and **3** (d) in 0.1 M PBS at pH = 9.0.

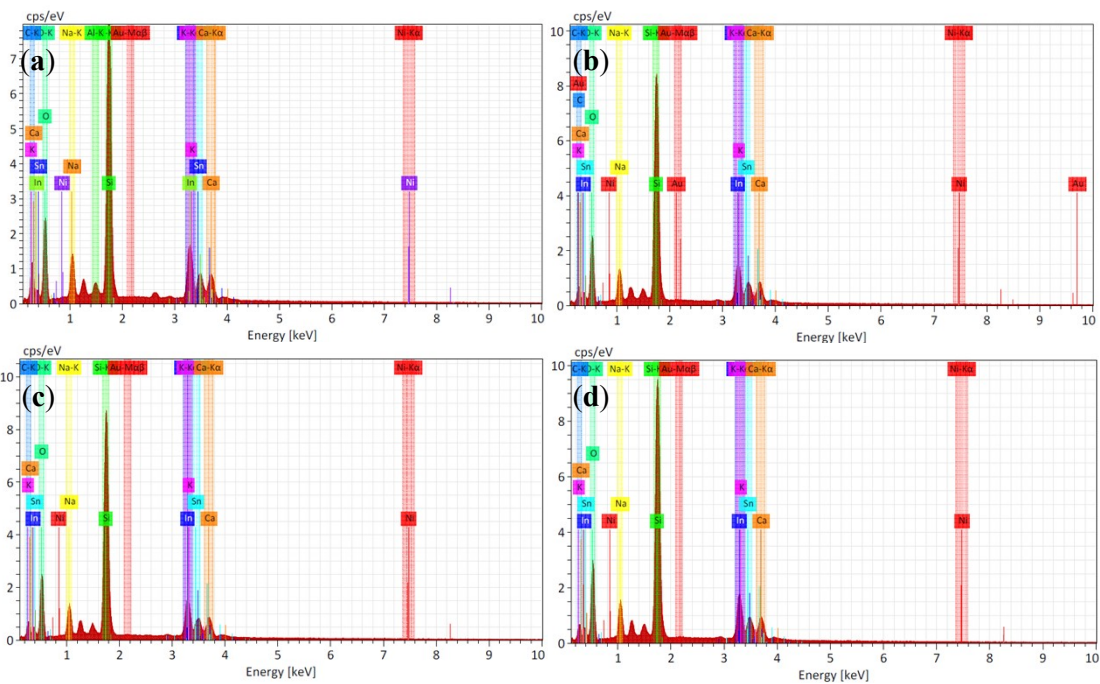

**Fig. S21** EDX analysis result of the surface of ITO electrode before (a) and after 4 h CPE experiments of 1 mM of **1** (b), **2** (c) and **3** (d) in 0.1 M PBS at pH = 9.0.

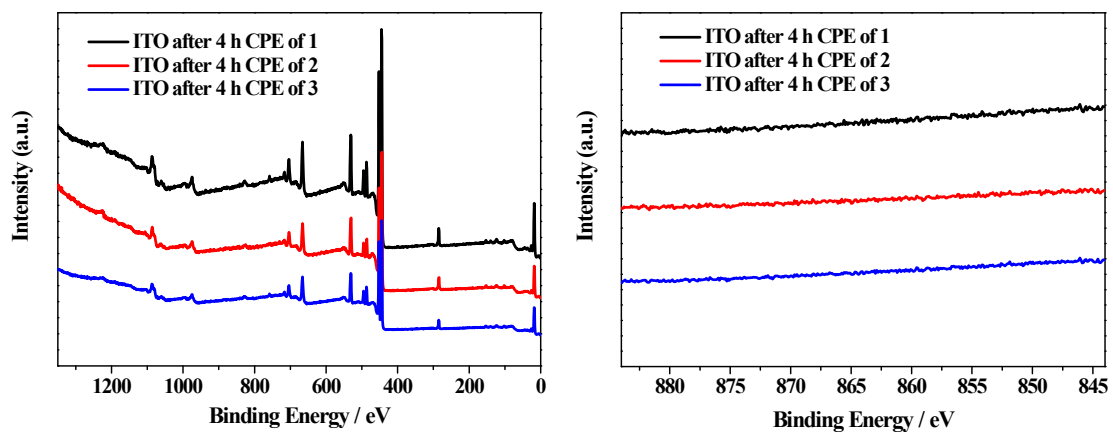

**Fig. S22** Full XPS spectra (left) and XPS spectra of Ni element (right) on ITO electrode used for 4 h CPE test of complexes **1–3** at 1.45 V vs. NHE with 0.1 M PBS at pH 9.0 as electrolyte.
